# Supplementary material for: Expanded carrier screening for 224 monogenic disease genes in 1,499 Chinese couples: a single-center study
Source: publisher site journal article supplement (doi:10.1515/cclm-2024-0649), 2024-11-19
Supplement: Supplementary file 1 [file j_cclm-2024-0649_suppl_002.xlsx]

## Sheet: Sheet1
Gene	Number of variants	Carrier frequency (1/n)
GJB2	336	1/9
SLC26A4	91	1/33
ATP7B	83	1/36
GALC	83	1/36
PAH	82	1/37
USH2A	62	1/48
POLG	60	1/50
HBA1	53	1/57
CYP21A2	56	1/54
SLC25A13	53	1/57
ACADS	43	1/70
SMN1	41	1/73
SLC22A5	41	1/73
MMACHC	41	1/73
UGT1A1	39	1/77
PKHD1	38	1/79
ETFDH	29	1/103
CYP27A1	29	1/103
ABCG5	28	1/107
GAA	28	1/107
MMUT	24	1/125
ACADSB	23	1/130
CFTR	23	1/130
TYR	23	1/130
ALPL	21	1/143
AGXT	20	1/150
MCPH1	19	1/158
COL7A1	18	1/167
G6PC1	18	1/167
GNE	18	1/167
CAPN3	18	1/167
PTS	18	1/167
ACADVL	17	1/176
DYSF	17	1/176
CEP290	16	1/187
TH	16	1/187
NPHS1	15	1/200
GALT	15	1/200
PMM2	14	1/214
PRF1	14	1/214
DYNC2H1	13	1/231
SLC26A2	13	1/231
GCDH	12	1/250
BTD	12	1/250
COL4A3	11	1/273
PCCB	11	1/273
ASS1	11	1/273
ACADM	10	1/300
EVC2	10	1/300
ERCC2	10	1/300
HLCS	10	1/300
CC2D2A	10	1/300
SMPD1	9	1/333
TGM1	9	1/333
LAMA2	9	1/333
ARSA	9	1/333
NPHP3	9	1/333
RARS2	9	1/333
PCCA	9	1/333
OCA2	9	1/333
GRHPR	9	1/333
GBA1	9	1/333
ATM	8	1/375
BCKDHB	8	1/375
NEB	8	1/375
NPC1	8	1/375
CPS1	8	1/375
ABCC8	8	1/375
GNPTAB	8	1/375
SACS	8	1/375
PEX6	7	1/428
FANCC	7	1/428
TNXB	7	1/428
BBS2	7	1/428
CBS	7	1/428
HBB	7	1/428
MYO7A	7	1/428
CTNS	7	1/428
ADA	6	1/500
BLM	6	1/500
GLB1	6	1/500
MCCC1	6	1/500
HGSNAT	6	1/500
FANCA	6	1/500
CNGB3	6	1/500
SGSH	6	1/500
LAMB3	6	1/500
HPS1	6	1/500
STAR	6	1/500
IVD	5	1/600
HPS3	5	1/600
ASL	5	1/600
BCS1L	5	1/600
ALDH3A2	5	1/600
NAGLU	5	1/600
DHCR7	5	1/600
MCCC2	5	1/600
COL4A4	5	1/600
AGL	5	1/600
SLC37A4	5	1/600
ERCC8	5	1/600
CHRNE	5	1/600
CYP27B1	5	1/600
IDUA	5	1/600
HBA2	4	1/750
CDH23	4	1/750
FKTN	4	1/750
PEX1	4	1/750
ALDOB	4	1/750
RTEL1	4	1/750
FANCI	4	1/750
ARG1	4	1/750
AMT	4	1/750
ERCC6	4	1/750
BCKDHA	3	1/999
XPC	3	1/999
NPHS2	3	1/999
CLCN1	3	1/999
ANO10	3	1/999
ACAT1	3	1/999
ASPA	3	1/999
PEX7	3	1/999
ELP1	3	1/999
NBN	3	1/999
LAMA3	3	1/999
BBS1	3	1/999
POMGNT1	3	1/999
CYP11B1	3	1/999
PCDH15	3	1/999
TPP1	3	1/999
MAN2B1	3	1/999
SGCB	3	1/999
CCDC88C	3	1/999
USH1C	3	1/999
CPT2	2	1/1499
DBT	2	1/1499
BBS12	2	1/1499
MMAA	2	1/1499
SGCA	2	1/1499
HSD17B4	2	1/1499
GLDC	2	1/1499
FKRP	2	1/1499
LAMC2	2	1/1499
RNASEH2B	2	1/1499
DOK7	2	1/1499
LRPPRC	2	1/1499
AHI1	2	1/1499
ABCA3	2	1/1499
ABCG8	2	1/1499
CPT1A	2	1/1499
CYP11A1	2	1/1499
HEXB	2	1/1499
PEX2	2	1/1499
MAT1A	1	1/2998
GBE1	1	1/2998
FMO3	1	1/2998
TTPA	1	1/2998
NAGA	1	1/2998
FAH	1	1/2998
AIRE	1	1/2998
PROP1	1	1/2998
LIPA	1	1/2998
LRP2	1	1/2998
MPI	1	1/2998
NPC2	1	1/2998
MCOLN1	1	1/2998
SLC25A15	1	1/2998
FANCG	1	1/2998
SLC12A6	1	1/2998
TMEM216	1	1/2998
HEXA	1	1/2998
CLN3	1	1/2998
PC	1	1/2998
AGA	1	1/2998
CTSK	1	1/2998
BBS10	1	1/2998
DLD	0	0
PPT1	0	0
CLN5	0	0
CLN6	0	0
CLN8	0	0
MMAB	0	0
HADHA	0	0
HMGCL	0	0
SCO2	0	0
SLC19A3	0	0
SLC17A5	0	0
SGCG	0	0
SGCD	0	0
FXN	0	0
MLC1	0	0
CLRN1	0	0
DHDDS	0	0
TF	0	0
MVK	0	0
RMRP	0	0
GRIP1	0	0
UBE3A	0	0
