# Supplementary material for: Expanded carrier screening for 224 monogenic disease genes in 1,499 Chinese couples: a single-center study
Source: publisher site journal article supplement (doi:10.1515/cclm-2024-0649), 2024-11-19
Supplement: Supplementary file 1 [file j_cclm-2024-0649_suppl_004.docx]

Supplemental Material

Supplemental Table 1 The complete list of 224 genes (26 X-linked diseases and 198 AR conditions) included in the panel for carrier screening.

Supplemental Table 2 The entire results of carrier frequency for 198 AR genes in 1,499 couples (2,998 individuals).

Supplemental Table 3 The entire results of carrier frequency for 26 X-linked in 1,499 women.
